# Supplementary material for: In situ nuclear magnetic resonance response of permafrost andactive layer soil in boreal and tundra ecosystems
Source: Copernicus journal article supplement (doi:10.5194/tc-2016-256), 2017-01-23
Supplement: Supplementary file 1 [file tc-2016-256-supplement.pdf]

# Supplementary material

M. Andy Kass et al.

October 31, 2016

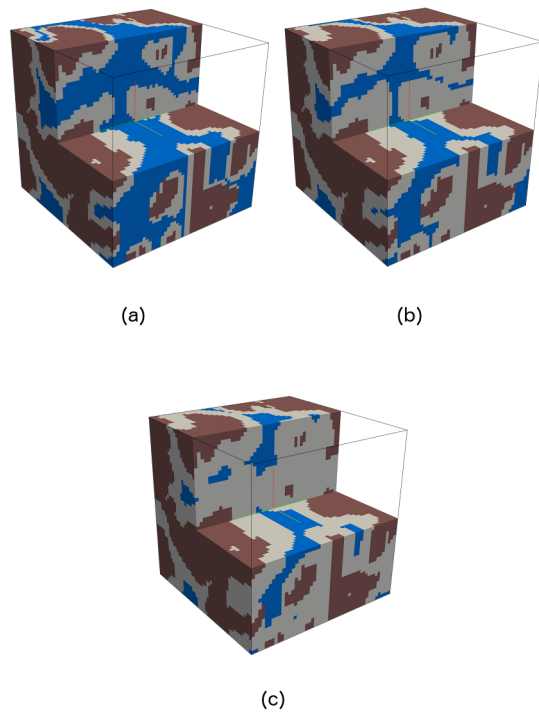

Figure 1: Soil freezing models for three stages of freezing using the inverse pore freezing model. In this model, ice freezes from the pore walls toward the centers.

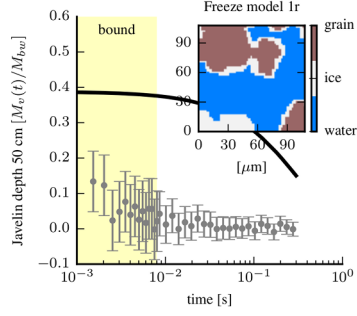

(a)

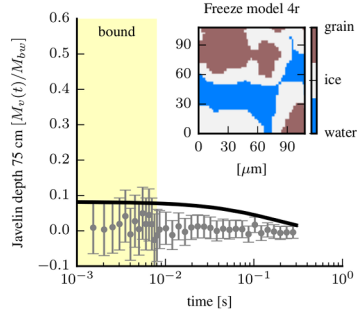

(b)

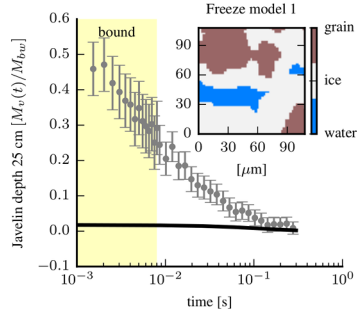

(c)

Figure 2: Observed (points) and predicted (line) data for progressively frozen models, corresponding to progressive depths in AK204-ROAD. This is the inverse freezing model, where ice aggrades from the pore walls towards the centers. Note how the model is completely unable to fit the data.
